# Supplementary material for: Graphenequantum dots embedded in a hexagonal BN sheet: identical influences of zigzag/armchair edges
Source: Royal Society of Chemistry journal article supplement (doi:10.1039/c2cp42994b), 2012-11-12
Supplement: c2cp42994b.pdf [file c2cp42994b.pdf]

## Electronic Supplementary Information

# Graphene quantum dots embedded in a hexagonal BN sheet: Identical influences of zigzag/armchair edges

**Ruiqi Zhao,<sup>a,b,c</sup> Jinying Wang,<sup>a,b</sup> Mingmei Yang,<sup>a,b</sup> Zhongfan Liu,<sup>\*a,b</sup> and Zhirong Liu<sup>\*a,b</sup>**

<sup>a</sup> *College of Chemistry and Molecular Engineering, Peking University, Beijing, 100871, China.*

*E-mail: zfliu@pku.edu.cn (Zhongfan Liu), LiuZhiRong@pku.edu.cn (Zhirong Liu).*

<sup>b</sup> *Center for Nanochemistry, State Key Laboratory for Structural Chemistry of Unstable and Stable Species, and Beijing National Laboratory for Molecular Sciences (BNLMS), Peking University, Beijing 100871, China*

<sup>c</sup> *College of Physics and Chemistry, Henan Polytechnic University, Henan 454003, China*

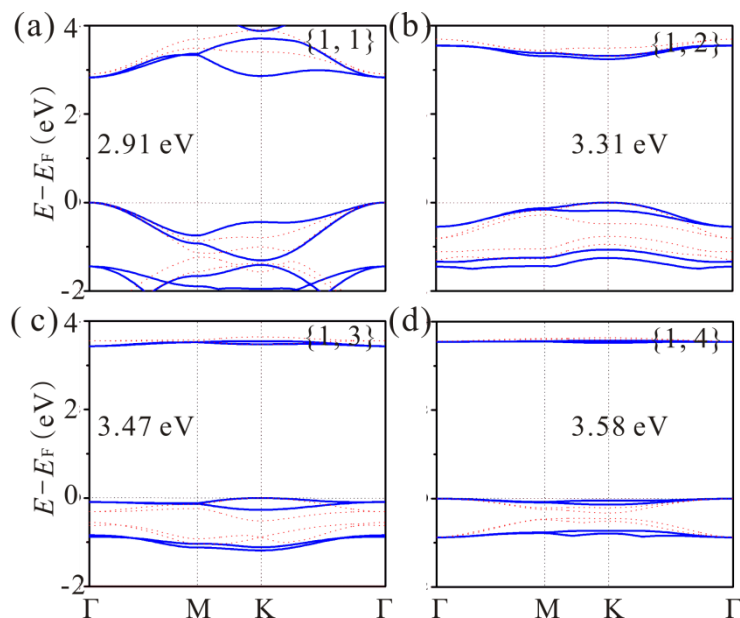

**Fig. S1** Energy band structures for ZHR- GQDs embedded in BN with a system notation  $\{R, W\}$  of (a)  $\{1, 1\}$ , (b)  $\{1, 2\}$ , (c)  $\{1, 3\}$  and (d)  $\{1, 4\}$  obtained from TB (blue solid lines) and DFT (red dashed lines). The value obtained from TB is also labeled in each panel.

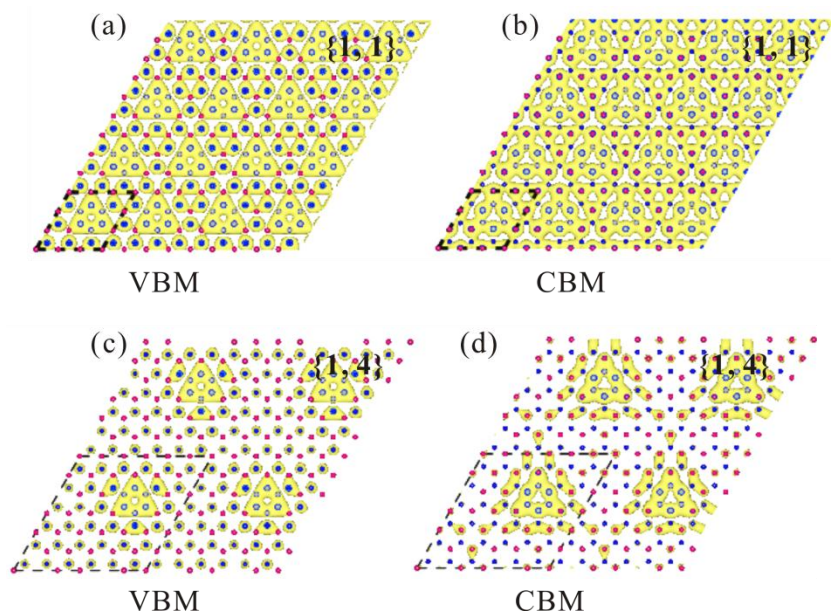

**Fig. S3** The electron charge density distribution of the valence states of ZHR- GQDs in BN at the  $\Gamma$  point with different  $\{R, W\}$  (isosurfaces correspond to the value of  $5 \times 10^{-4} \text{ eÅ}^{-3}$ ). (a) VBM of  $\{1, 1\}$ , (b) CBM of  $\{1, 1\}$ , (c) VBM of  $\{1, 4\}$ , and (d) CBM of  $\{1, 4\}$ . The supercell is also labeled by dashed rectangle in each panel. The red (dark gray), blue (black), and gray (light gray) spheres represent B, N, and C atoms, respectively.
